# Supplementary material for: Pd nanoparticles decorating flower-like Co3O4 nanowire clusters to form an efficient, carbon/binder-free cathode for Li–O2 batteries
Source: Royal Society of Chemistry journal article supplement (doi:10.1039/c5ta03144c), 2015-01-01
Supplement: c5ta03144c1.pdf [file c5ta03144c1.pdf]

**Pd nanoparticles decorating flower-like Co<sub>3</sub>O<sub>4</sub> nanowire  
clusters to form an efficient, carbon/binder-free cathode for the  
Li–O<sub>2</sub> battery**

*Limin Leng, Xiaoyuan Zeng, Huiyu Song, Ting Shu, Haishui Wang, Shijun Liao\**

The Key Laboratory of Fuel Cell Technology of Guangdong Province, School of  
Chemistry and Chemical Engineering, South China University of Technology,  
Guangzhou 510641, China

---

\* Corresponding author Fax: +86 20 87113586. E-mail address: chsjliao@scut.edu.cn

Supporting information:

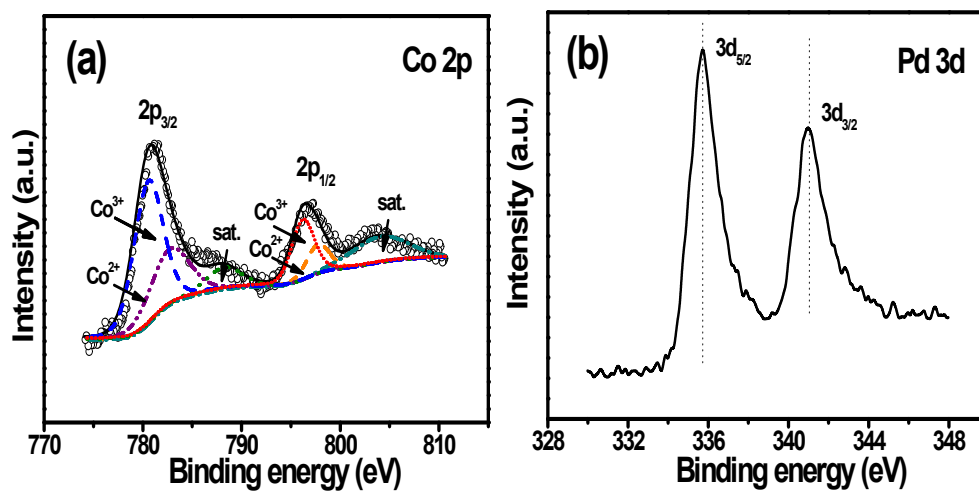

Fig. S1 (a) Co 2p XPS and (b) Pd 3d XPS of Pd/Co<sub>3</sub>O<sub>4</sub>.

In Figure S1a, the peaks at 780.4 eV and 795.8 eV are the Co 2p spectra of Co<sup>3+</sup>, and the peaks at 781.8 eV and 797.8 eV are the Co 2p spectra of Co<sup>2+</sup>. In Figure S1b, the peaks at 335.6 eV and 341.1 eV are the Pd 3d spectra of metallic Pd<sup>0</sup>.

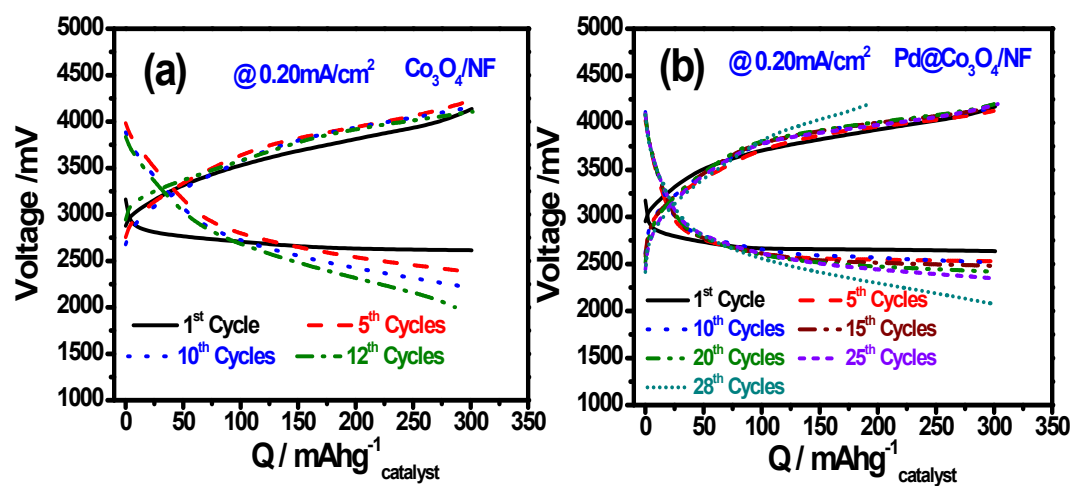

**Fig. S2** Discharge-charge profiles at various cycles of Li-O<sub>2</sub> batteries with (a) Co<sub>3</sub>O<sub>4</sub>/NF and (b) Pd/Co<sub>3</sub>O<sub>4</sub>/NF cathodes at a limited capacity of 300  $\text{mAhg}^{-1}$  under current density of 0.20 mAcm<sup>-2</sup>.

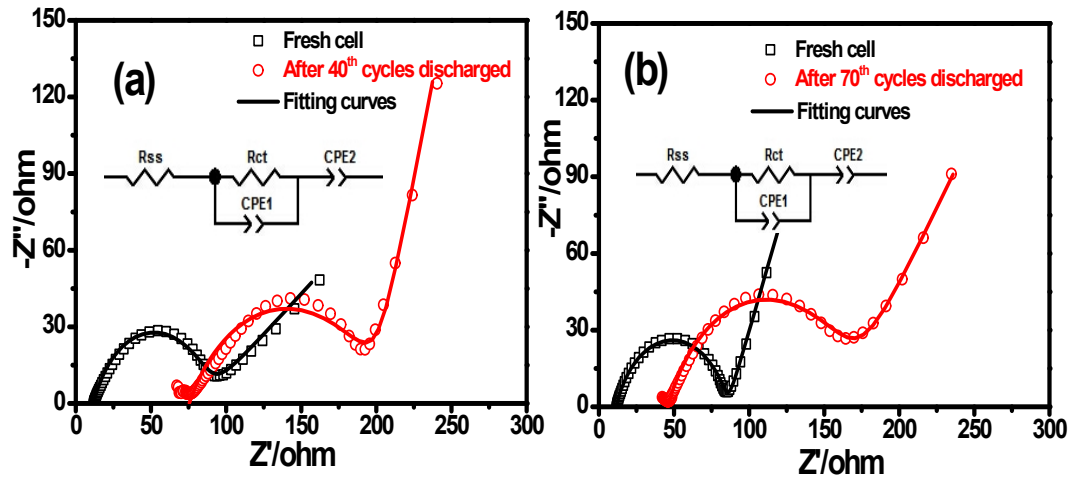

**Fig. S3** Electrochemical impedance spectra (EIS) of Li-O<sub>2</sub> batteries based Co<sub>3</sub>O<sub>4</sub> and Pd/Co<sub>3</sub>O<sub>4</sub> catalysts after discharged with different cycles (The inset shows the equivalent circuit<sup>3, 4</sup> that the data (circles) were fitted with (solid lines)).

$R_{ss}$  is electronic resistance of the Li-O<sub>2</sub> cell consists of the electrodes, contacts, and electrolyte resistance.  $R_{ct}$  is the charge transfer resistance and CPE1, CPE2 are the constant phase elements. The CPE2 is related to diffusion of active species to the surfaces of the electrodes.

Table 1 Values of the fitting parameters evaluated from the equivalent circuit with different cathode catalysts after discharged at various cycles.

|                    | Li/O <sub>2</sub> batteries (Co <sub>3</sub> O <sub>4</sub> ) |        |                                                |        | Li/O <sub>2</sub> batteries (Pd/Co <sub>3</sub> O <sub>4</sub> ) |         |                                                |         |
|--------------------|---------------------------------------------------------------|--------|------------------------------------------------|--------|------------------------------------------------------------------|---------|------------------------------------------------|---------|
|                    | Fresh cell                                                    | Error% | After 40 <sup>th</sup><br>cycles<br>discharged | Error% | Fresh<br>cell                                                    | Error%  | After 70 <sup>th</sup><br>cycles<br>discharged | Error%  |
| R <sub>ss</sub> /Ω | 12.34                                                         | 1.6335 | 76.3                                           | 0.725  | 11.76                                                            | 0.52185 | 46.02                                          | 0.58281 |
| R <sub>ct</sub> /Ω | 71.67                                                         | 1.1697 | 124.9                                          | 1.7382 | 73.99                                                            | 0.70773 | 119.5                                          | 1.3686  |
| CPE1-T/F           | 2.34E-05                                                      | 6.2539 | 2.05E-04                                       | 7.7034 | 2.18E-05                                                         | 4.4269  | 1.43E-04                                       | 4.7314  |
| CPE1-P             | 0.7928                                                        | 1.0199 | 0.66842                                        | 1.9275 | 0.7771                                                           | 0.63965 | 0.73634                                        | 1.1106  |
| CPE2-T/F           | 0.013489                                                      | 1.1566 | 0.01122                                        | 1.8377 | 0.0158                                                           | 2.1261  | 0.01142                                        | 1.5853  |
| CPE2-P             | 0.36323                                                       | 1.854  | 0.81005                                        | 1.9107 | 0.70997                                                          | 1.9711  | 0.57375                                        | 1.9495  |

## References

1. W. Song, A. S. Poyraz, Y. Meng, Z. Ren, S.-Y. Chen and S. L. Suib, *Chemistry of Materials*, 2014, **26**, 4629-4639.
2. G. Ketteler, D. F. Ogletree, H. Bluhm, H. J. Liu, E. L. D. Hebenstreit and M. Salmeron, *Journal of the American Chemical Society*, 2005, **127**, 18269-18273.
3. B. D. Adams, C. Radtke, R. Black, M. L. Trudeau, K. Zaghbi and L. F. Nazar, *Energy & Environmental Science*, 2013, **6**, 1772-1778.
4. R. Younesi, M. Hahlin, M. Roberts and K. Edström, *Journal of Power Sources*, 2013, **225**, 40-45.
